# Supplementary material for: Inference of Functional Relations in Predicted Protein Networks with a Machine Learning Approach
Source: PLOS journal article supplement (doi:10.1371/journal.pone.0009969), 2010-04-01
Supplement: S5 (10.1371/journal.pone.0009969.s005) [file journal.pone.0009969.s005]

## Text S1: AODE detailed description

AODE (Averaged One-Dependence Estimators) [1] is a machine learning classifier.

This algorithm improves Naïve Bayes (NB) model [2] relaxing the attribute independence assumption of NB, where each attribute can depend on the class.

The Naïve Bayes algorithm is based on conditional probabilities defined in Eq. 1, where  $y \in c_1, \dots, c_k$  are the  $k$  classes of an example  $x = \langle x_1, \dots, x_n \rangle$ , where  $x_i$  is the value of the  $i^{th}$  attribute.

$$P(y|x) = P(y, x) / P(x) \quad (\text{Eq. 1})$$

Hence, the value class for an example is calculated according Eq. 2, it means the highest conditional probabilities accumulation of each attribute respect to class attribute.

$$\underset{y}{\operatorname{argmax}} \left( \hat{P}(y) \prod_{i=1}^n \hat{P}(x_i|y) \right) \quad (\text{Eq. 2})$$

where  $\hat{P}(y)$  and  $\hat{P}(x_i|y)$  are estimates of the respective probabilities derived from the frequency of their respective arguments in the training sample. At training time NB just needs to compile a table of class probability estimates and a table of conditional attribute-value probability estimates, from the training set [1].

AODE improves independence assumptions, without increasing computational complexity. Naïve Bayes approaches, such as Lazy Bayes Rules [3] are very costly in classification time, while other approaches like TAN [4] require higher training times. AODE achieves lower computational cost by replacing model selection with model average. Classes are calculated by aggregating predictions from an ensemble of one-dependence classifiers by aggregating the predictions of all qualified classifiers, as Eq. 3 shows.

$$\underset{y}{\operatorname{argmax}} \left( \sum_{i: 1 \leq i \leq n \wedge F(x_i) \geq m} \hat{P}(y, x_i) \prod_{j=1}^n \hat{P}(x_j|y, x_i) \right) \quad (\text{Eq. 3})$$

If  $\neg \exists i : 1 \leq i \leq n \wedge F(x_i) \geq m$ , AODE defaults to NB.  $F(x_i)$  is a count of the number of training examples having  $x_i$  value-attribute.

In this experiment we used the weka's AODE implementation [5].

## References

1. Webb, G. I., Boughton, J. R. & Wang, Z. Not So Naive Bayes: Aggregating One-Dependence Estimators. *Mach. Learn.* 58, 5-24 (2005).
2. John, G. H. & Langley, P. Estimating Continuous Distributions in Bayesian Classifiers (Proceedings of the Eleventh Conference on Uncertainty in Artificial Intelligence, Morgan Kaufmann, San Mateo, 1995).
3. Zheng, Z., & Webb, G. I. (2000). Lazy learning of Bayesian Rules. *Machine Learning*, 41 (1), 53–84.
4. Friedman, N., Geiger, D. & Goldszmidt, M. Bayesian Network Classifiers. *Mach. Learning* 29, 131-163 (1997). Witten, I. H. & Frank, E. in *Data Mining: Practical machine learning tools and techniques* (ed Kaufmann, M.) (Morgan Kaufmann, San Francisco, 2005).
